# Supplementary material for: An aggregation-induced emission-active bis-heteroleptic ruthenium(ii) complex of thiophenyl substituted phenanthroline for the selective “turn-off” detection of picric acid
Source: Royal Society of Chemistry journal article supplement (doi:10.1039/d1nj04798a), 2021-11-17
Supplement: d1nj04798a1.pdf [file d1nj04798a1.pdf]

## **Electronic Supplementary Information (ESI)**

# **An aggregation-induced emission-active bis-heteroleptic ruthenium(II) complex of thiophenyl substituted phenanthroline for selective “turn-off” detection of picric acid**

Sumit Kumar Patra, Bhaskar Sen, Monosh Rabha, Snehadrinarayan Khatua

*Centre for Advanced Studies, Department of Chemistry, North-Eastern Hill*

*University, Shillong, Meghalaya 793022, India.*

*Email: [snehadri@gmail.com](mailto:snehadri@gmail.com); [skhatua@nehu.ac.in](mailto:skhatua@nehu.ac.in)*

## Table of Contents

## Page no

|                                                      |        |
|------------------------------------------------------|--------|
| 1. Compound used in this study                       | S2     |
| 2. NMR spectra of <b>L1</b>                          | S3     |
| 3. ESI-MS spectrum of <b>L1</b>                      | S4     |
| 4. NMR spectra of <b>Ru-1</b>                        | S4-S6  |
| 5. ESI-MS spectrum of <b>Ru-1</b>                    | S7     |
| 6. UV-vis spectra of Ru-1 at differ water fraction   | S7     |
| 7. Comparison table of reported probes and our probe | S8     |
| 8. Computational studies                             | S9-S10 |

**Chart S1:** Compound used in this study

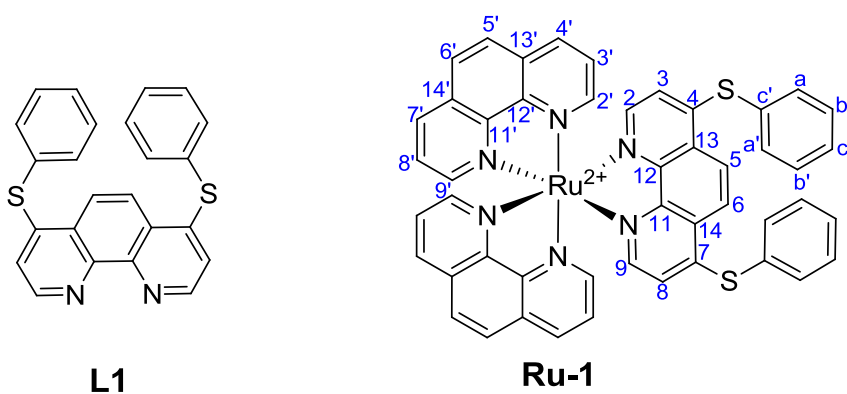

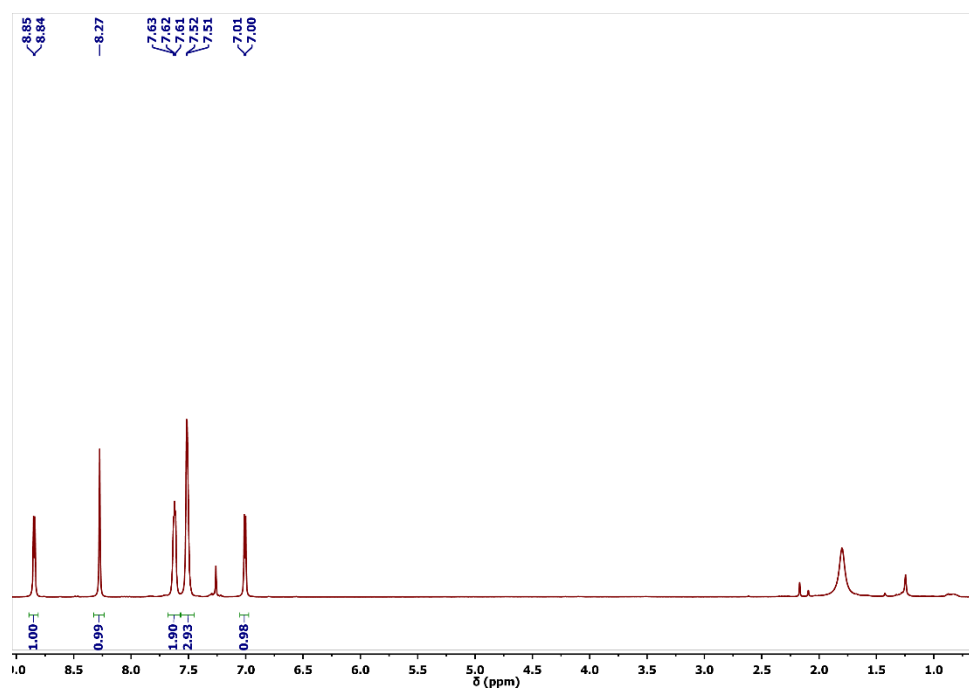

**Figure S1.**  $^1\text{H}$  NMR spectrum of **L1** in  $\text{CDCl}_3$ .

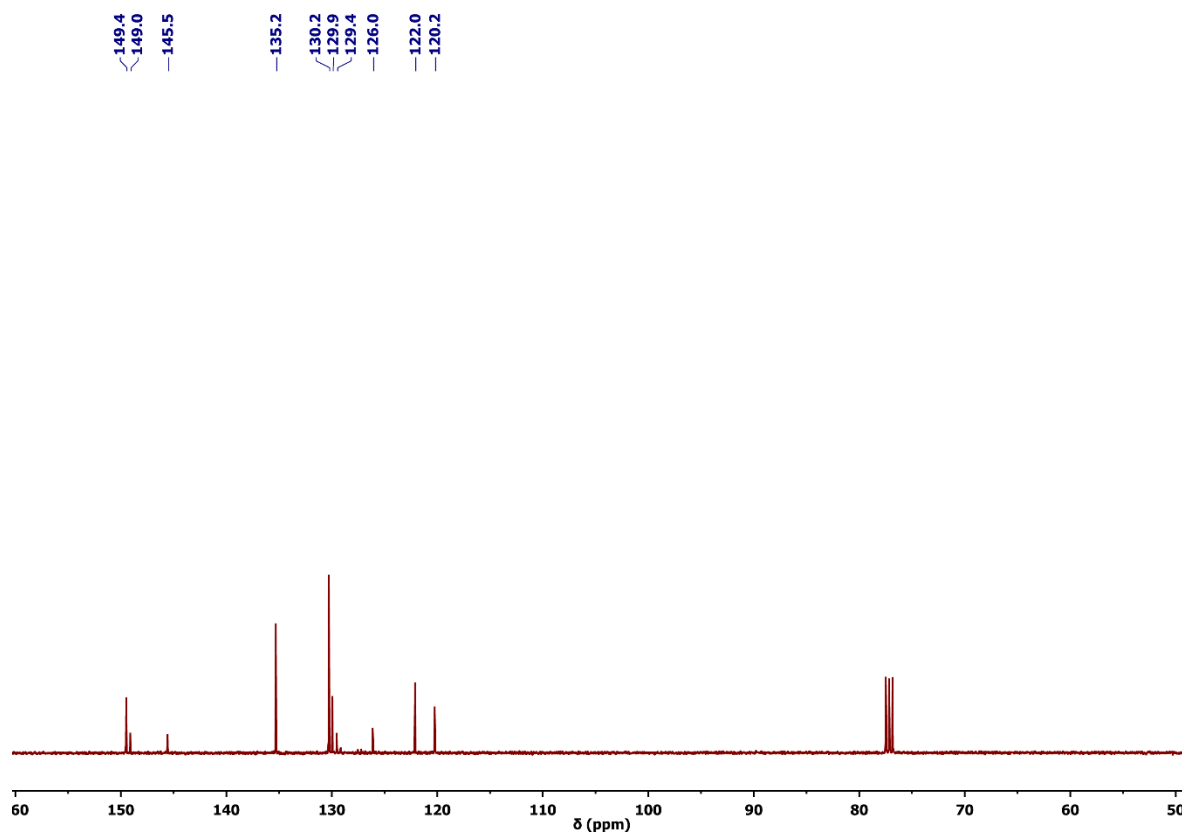

**Figure S2.**  $^{13}\text{C}$  NMR spectrum of **L1** in  $\text{CDCl}_3$ .

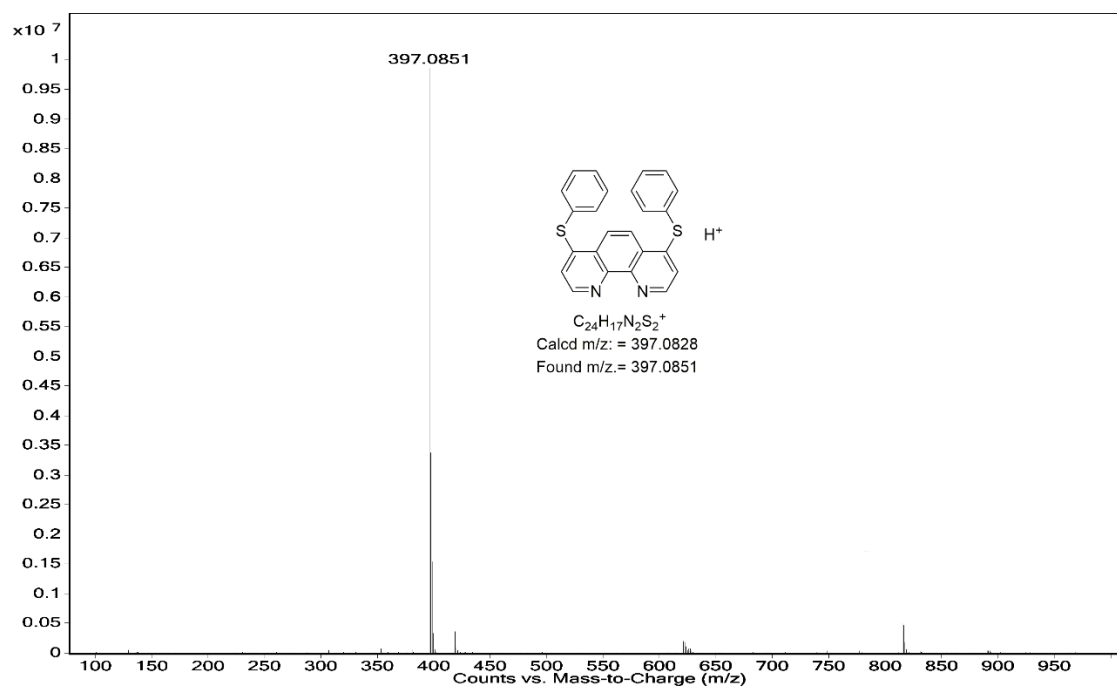

**Figure S3.** ESI-MS spectrum of **L1** in  $\text{CH}_3\text{OH}$ .

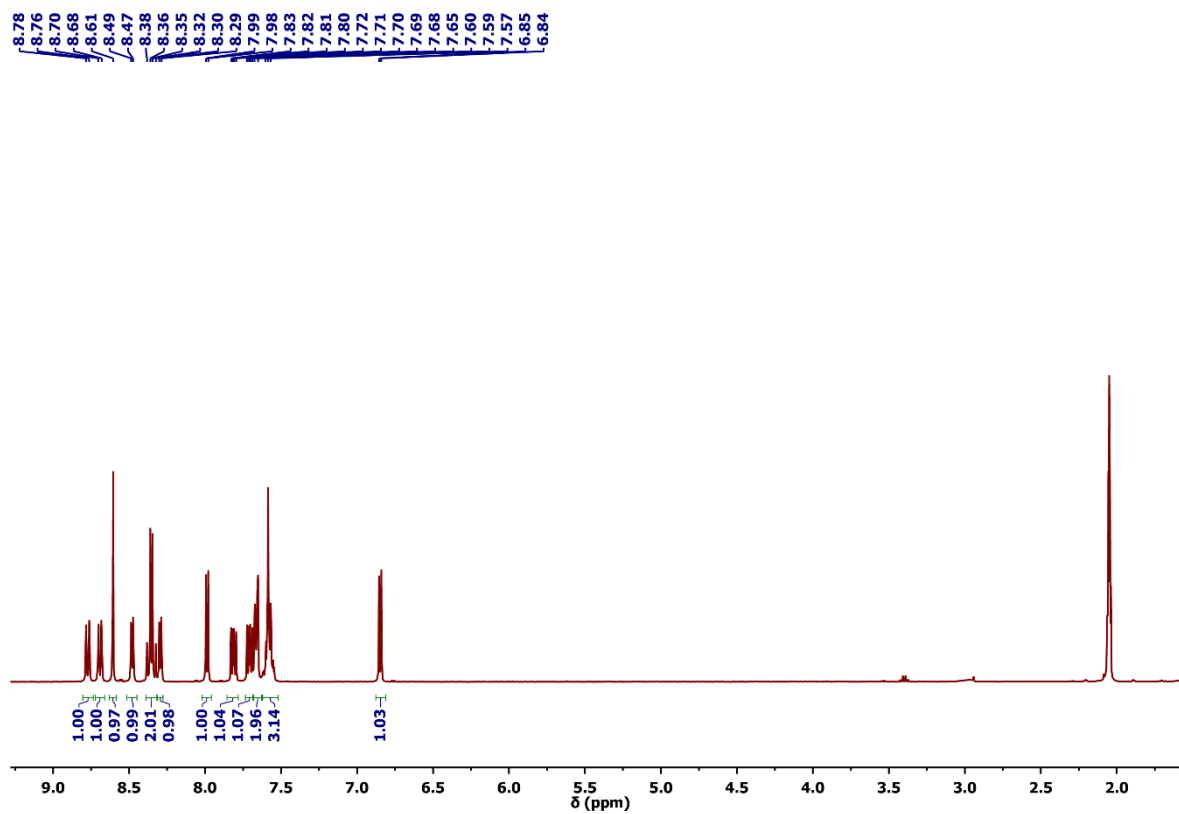

Figure S4.  $^1\text{H}$  NMR spectrum of **Ru-1** in Acetone- $d_6$ .

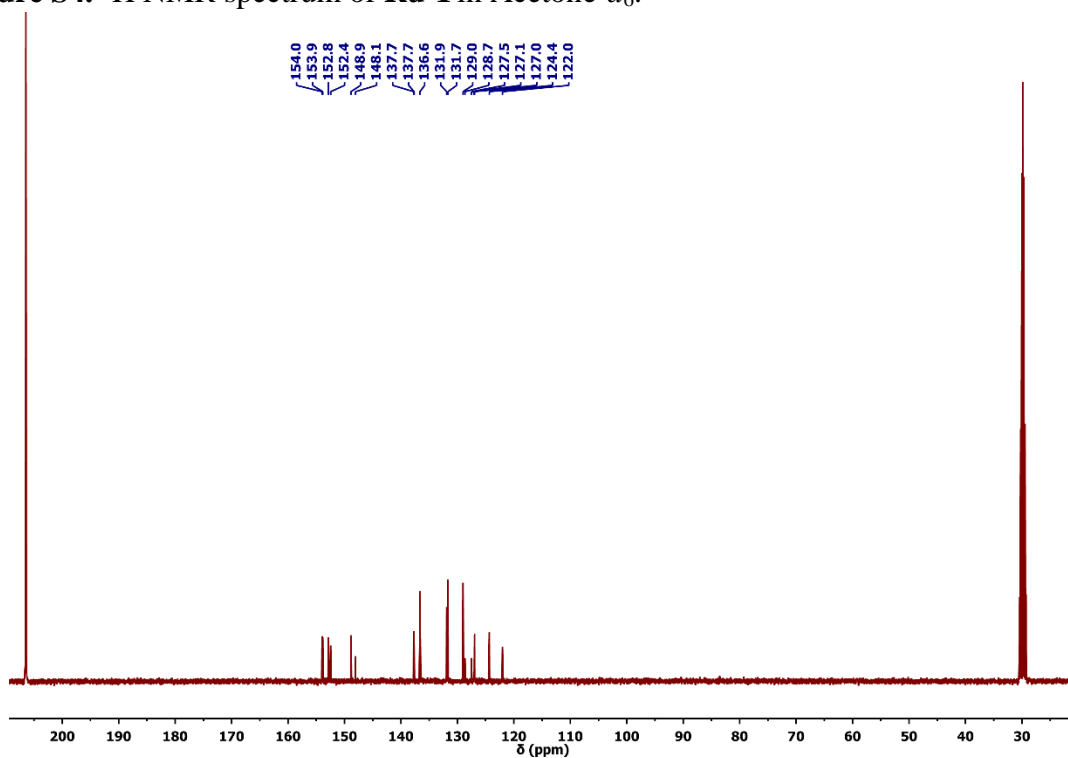

Figure S5.  $^{13}\text{C}$  NMR spectrum of **Ru-1** in Acetone- $d_6$ .

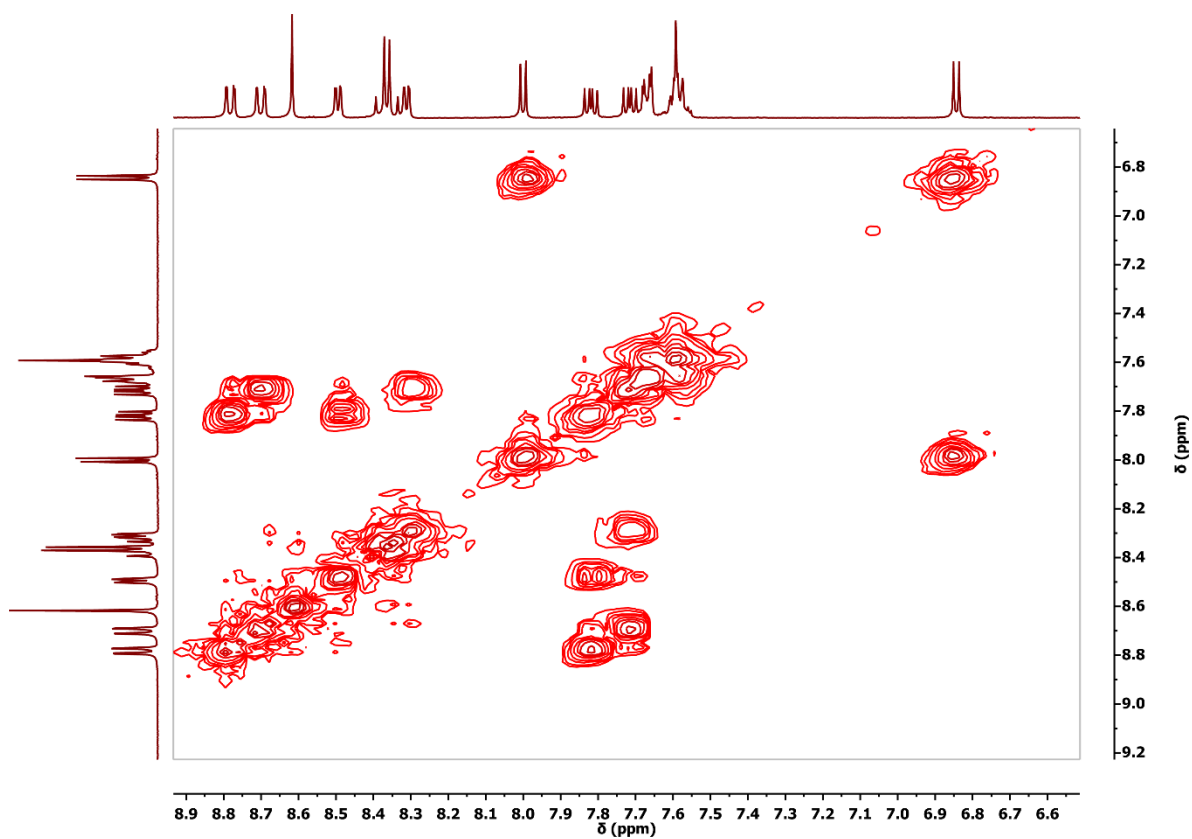

**Figure S6.**  $^1\text{H}$ - $^1\text{H}$  COSY NMR spectrum of **Ru-1** in Acetone- $d_6$ .

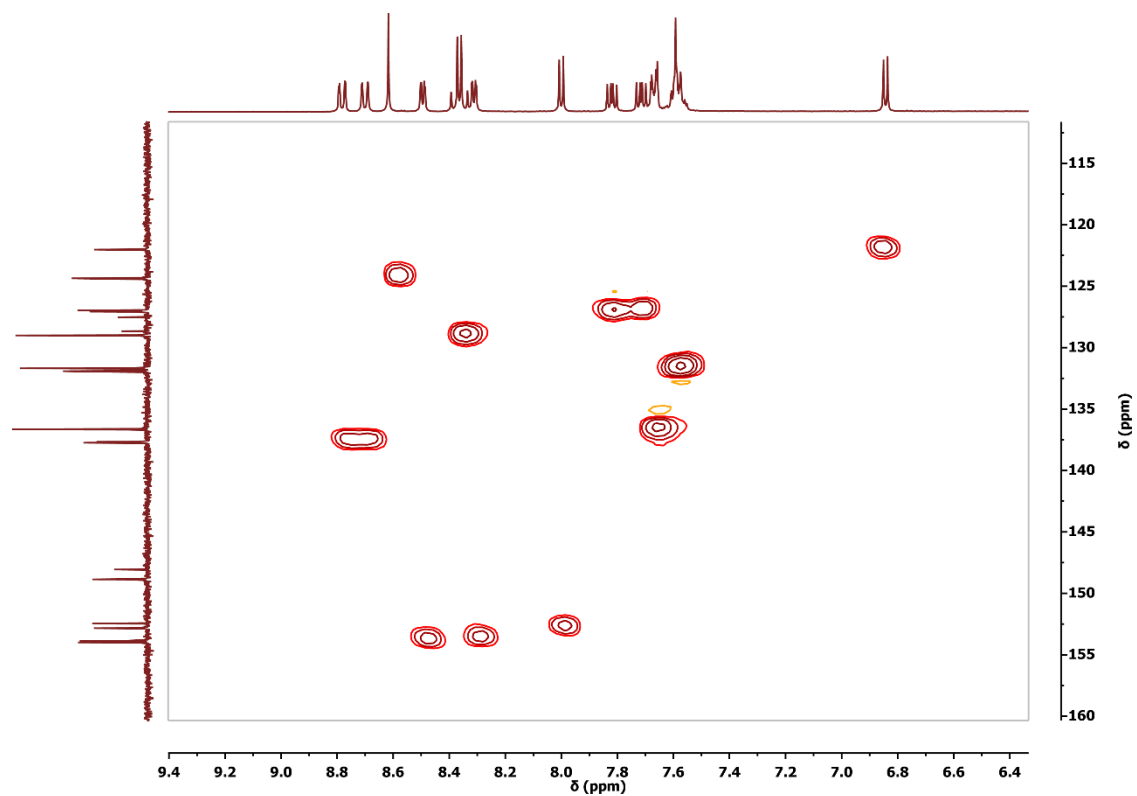

**Figure S7.**  $^1\text{H}$ - $^{13}\text{C}$  HSQC NMR spectrum of **Ru-1** in Acetone- $d_6$ .

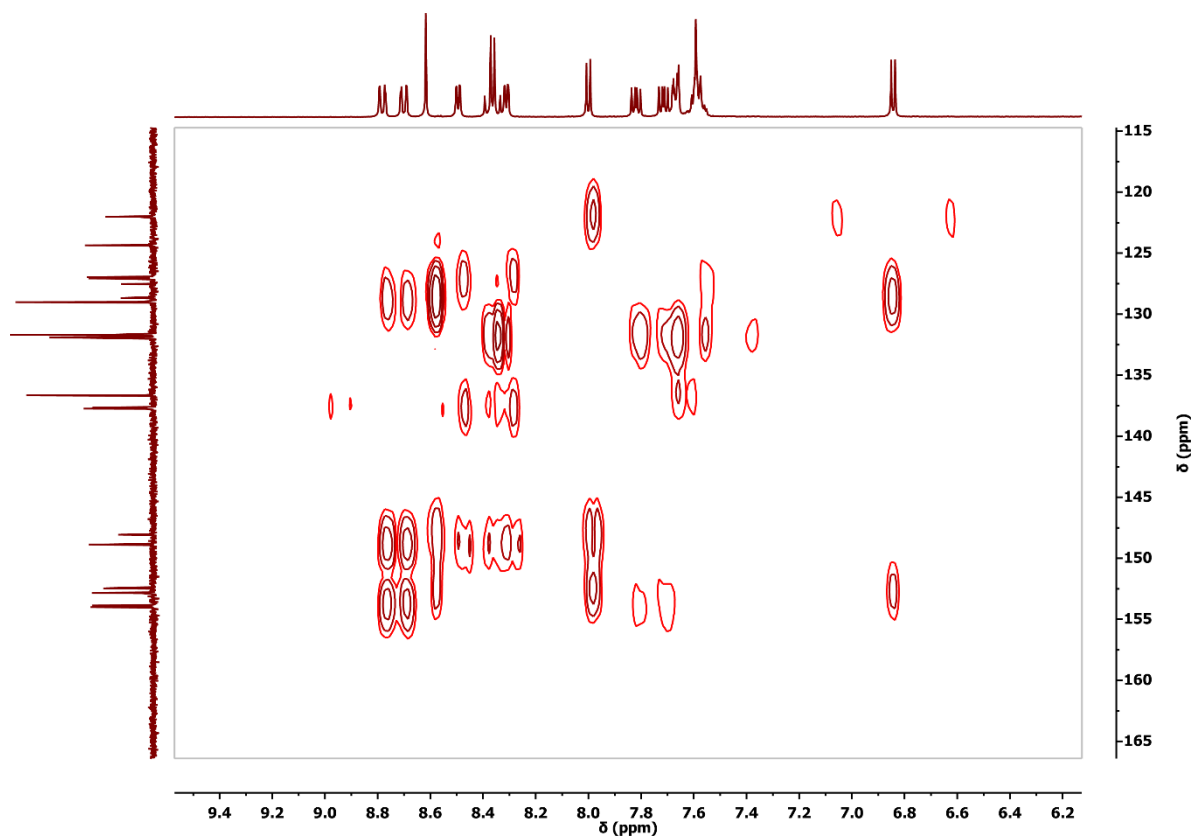

**Figure S8.** Partial  $^1\text{H}$ - $^{13}\text{C}$  HMBC NMR spectrum of **Ru-1** in Acetone- $d_6$ .

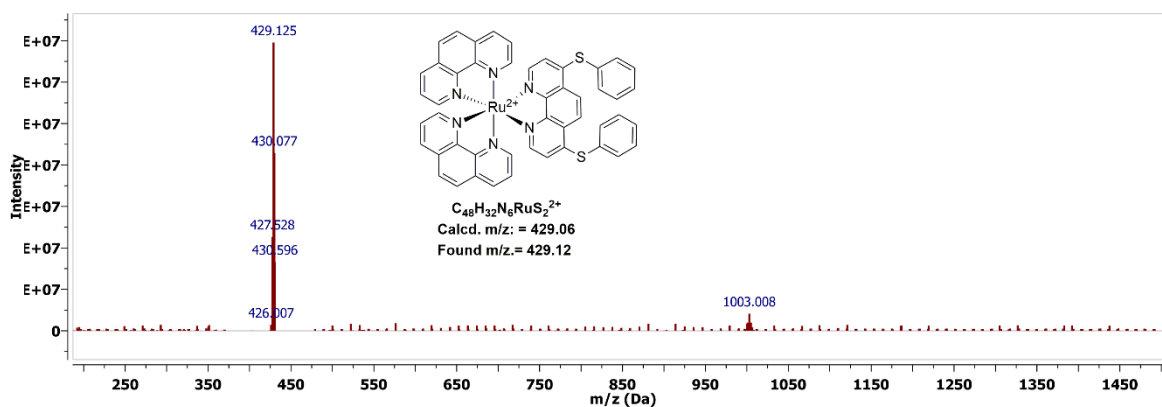

**Figure S9.** ESI-MS spectrum of **Ru-1** in  $\text{CH}_3\text{CN}$

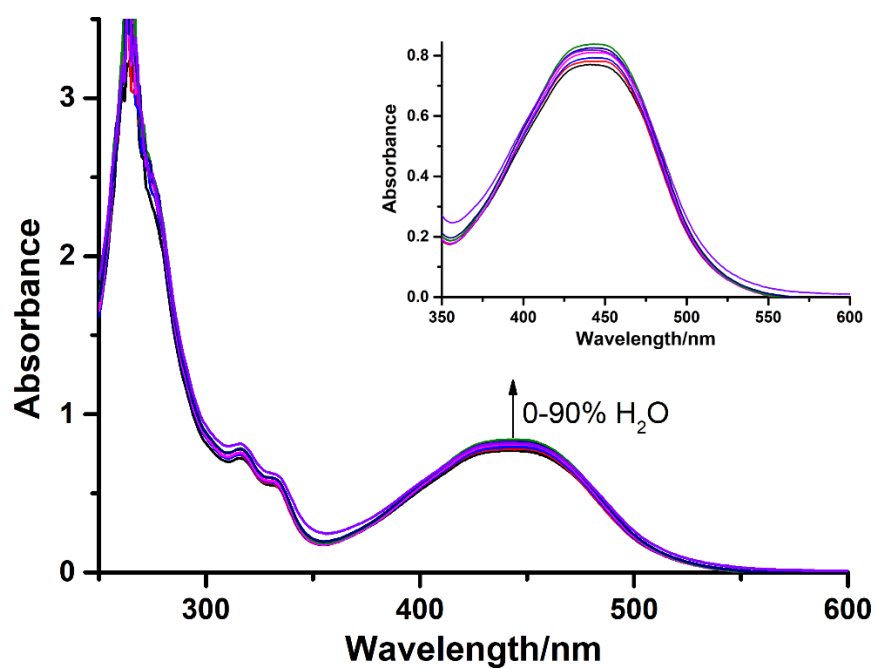

**Figure S10.** UV-vis spectra of **Ru-1** ( $25\ \mu\text{M}$ ) in  $\text{CH}_3\text{CN}$  with increasing water fractions (0-90%).

**Table S1.** List of reported picric acid selective probes and their Limit of Detection (LOD)

| SL No | Probe                                        | Limit of Detection (LOD)      | Medium                                         | References                                                                |
|-------|----------------------------------------------|-------------------------------|------------------------------------------------|---------------------------------------------------------------------------|
| 1     | Anthracene-bridged poly(N-vinyl pyrrolidone) | 6.0 $\mu\text{M}$             | Water                                          | <i>Analyst</i> , 2019, <b>144</b> , 3620–3634                             |
| 2     | Pyrene based polymer                         | 56 $\mu\text{M}$              | Water                                          | <i>ACS Appl. Mater. Interfaces</i> 2018, <b>10</b> , 41717–41723.         |
| 3.    | Bispyrene-Based                              | 1.0 $\mu\text{M}$             | Water                                          | <i>Langmuir</i> , 2014, <b>30</b> , 7645–7653                             |
| 4.    | Zn(II)-based MOF                             | 1.0 $\mu\text{M}$             | Water                                          | <i>CrystEngComm</i> , 2015, <b>17</b> , 9404–9412                         |
| 5.    | Anthracene Derivatives                       | 0.5 ppm                       | THF                                            | <i>Chem. Eur. J.</i> 2016, <b>22</b> , 2012 – 2019                        |
| 6.    | a-cyanostilbene Derivatives                  | 1.9 $\mu\text{M}$             | H <sub>2</sub> O/THF (7:3 v/v)                 | <i>Chem. Eur. J.</i> 2014, <b>20</b> , 12215 – 12222                      |
| 7.    | Triphenylamine                               | 20 $\mu\text{M}$              | H <sub>2</sub> O: THF (9:1)                    | <i>Chemistry Select</i> , 2019, <b>4</b> , 2868 –2873                     |
| 8.    | Lanthanide based coordination polymer        | 49 $\mu\text{M}$              | Chloroform                                     | <i>Cryst. Growth Des.</i> 2017, <b>17</b> , 3907-3916.                    |
| 9.    | Triazole trindane based probe                | 5.48 $\mu\text{M}$            | H <sub>2</sub> O/DMSO (1:1)                    | <i>Chemistry Select</i> , 2019, <b>4</b> , 10895-10901                    |
| 10.   | Benzimidazole-acrylonitriles derivative      | 41, 34, 11 $\mu\text{M}$      | Water                                          | <i>J. Photochem. Photobiol., A: Chemistry</i> , 2021, <b>404</b> , 112874 |
| 11.   | Triphenylbenzene                             | 1.5 ppm                       | Acetonitrile                                   | <i>New J. Chem.</i> , 2015, <b>39</b> , 886-892                           |
| 12.   | Zn(II) MOF                                   | 1.12 ppm                      | DMF                                            | <i>Dalton Trans.</i> , 2018, <b>47</b> , 9627–9633                        |
| 13.   | Pyrene derivative                            | 19 $\mu\text{M}$              | DMSO                                           | <i>Chem. – Eur. J.</i> , 2008, <b>14</b> , 1822–1827                      |
| 14.   | Polymer                                      | 40.7 $\mu\text{M}$            | Water                                          | <i>Anal. Chem.</i> , 2010, <b>82</b> , 4015–4019                          |
| 15.   | Ru(II) complex                               | 4.7 $\mu\text{M}$ or 1.08 ppm | H <sub>2</sub> O: CH <sub>3</sub> CN (7:3 v/v) | <b><i>This Work</i></b>                                                   |



**Table S2.** Selected bond lengths and angles in the optimized structure of **Ru-1**

| <b>Bond lengths (Å)</b> |        |                      |        |
|-------------------------|--------|----------------------|--------|
| N(32)- Ru(47)           | 2.1135 | N(39)- Ru(47)        | 2.1135 |
| N(25)- Ru(47)           | 2.1275 | N(18)- Ru(47)        | 2.1223 |
| N(11)-Ru(47)            | 2.1275 | N(4)-Ru(47)          | 2.1223 |
| <b>Bond angles (°)</b>  |        |                      |        |
| N(4)- Ru(47)- N(11)     | 78.52  | N(4)- Ru(47)- N(18)  | 173.25 |
| N(4)- Ru(47)- N(25)     | 96.60  | N(4)- Ru(47)- N(32)  | 89.09  |
| N(4)- Ru(47)- N(39)     | 96.17  | N(11)- Ru(47)- N(18) | 96.60  |
| N(11)- Ru(47)- N(25)    | 88.80  | N(11)- Ru(47)- N(32) | 96.87  |
| N(11)- Ru(47)- N(39)    | 172.68 | N(18)- Ru(47)- N(25) | 78.52  |
| N(18)- Ru(47)- N(32)    | 96.17  | N(18)- Ru(47)- N(39) | 89.09  |
| N(25)- Ru(47)- N(32)    | 172.68 | N(25)- Ru(47)- N(39) | 96.87  |
| N(32)- Ru(47)- N(39)    | 77.87  |                      |        |

**Table S3:** The x,y,z Cartesian coordinates of the complex **Ru-1** calculated using Gaussian 09 at B3LYP/6-31G(d) level and LANL2DZ for ruthenium and silver.

| <b>Ru-1</b> |         |          |          |   |                            |
|-------------|---------|----------|----------|---|----------------------------|
| C           | 2.33107 | -0.84047 | 4.82271  | C | -1.06127 -0.72036 -0.02556 |
| C           | 1.39254 | 0.09224  | 4.42262  | C | -2.28394 -1.4397 -0.05901  |
| C           | 1.22252 | 0.36056  | 3.05375  | C | -1.06243 0.71699 0.02437   |
| N           | 1.93546 | -0.25057 | 2.10372  | C | -2.28634 1.43435 0.05755   |
| C           | 2.86392 | -1.18019 | 2.488    | C | -3.50187 0.67857 0.02433   |
| C           | 3.10155 | -1.50903 | 3.8449   | C | -3.50075 -0.68602 -0.02597 |
| C           | 3.61389 | -1.82788 | 1.45319  | N | 0.16531 1.32745 0.02571    |
| C           | 4.59669 | -2.79079 | 1.78903  | C | 0.19803 2.66253 0.03201    |
| C           | 4.81951 | -3.10383 | 3.1729   | C | -0.95397 3.45138 0.07289   |
| C           | 4.10186 | -2.49099 | 4.15781  | C | -2.21891 2.86532 0.10039   |
| N           | 3.3326  | -1.47747 | 0.16029  | S | -3.58389 3.99855 0.03679   |
| C           | 4.02472 | -2.06723 | -0.81832 | C | -4.8235 3.38133 1.1847     |
| C           | 5.0188  | -3.02998 | -0.57396 | S | -3.57872 -4.00437 -0.03836 |

|   |          |          |          |    |          |          |          |
|---|----------|----------|----------|----|----------|----------|----------|
| C | 5.30706  | -3.39553 | 0.72767  | C  | -4.81715 | -3.38601 | -1.18701 |
| C | 2.33249  | 0.84236  | -4.82246 | Ru | 1.81079  | 0.00053  | -0.00003 |
| C | 1.3952   | -0.09183 | -4.4229  | C  | -6.13369 | -3.26033 | -0.72565 |
| C | 1.22481  | -0.36039 | -3.05412 | C  | -7.14388 | -2.8976  | -1.61966 |
| N | 1.93624  | 0.25186  | -2.10368 | C  | -6.84028 | -2.64705 | -2.95891 |
| C | 2.86346  | 1.18293  | -2.48744 | C  | -5.52428 | -2.77465 | -3.4129  |
| C | 3.10135  | 1.51214  | -3.84421 | C  | -4.51074 | -3.15862 | -2.53503 |
| C | 3.61182  | 1.83179  | -1.45222 | C  | -6.14529 | 3.28304  | 0.73164  |
| C | 4.59329  | 2.79626  | -1.78749 | C  | -7.1543  | 2.92242  | 1.62784  |
| C | 4.81641  | 3.10966  | -3.17123 | C  | -6.84458 | 2.64713  | 2.96083  |
| C | 4.10029  | 2.49567  | -4.15656 | C  | -5.52343 | 2.74768  | 3.40662  |
| N | 3.33036  | 1.48092  | -0.15948 | C  | -4.51062 | 3.1291   | 2.5268   |
| C | 4.02099  | 2.07177  | 0.81953  | H  | 2.48146  | -1.06418 | 5.87491  |
| C | 5.01368  | 3.03609  | 0.57575  | H  | 0.78364  | 0.62267  | 5.14683  |
| C | 5.3021   | 3.40211  | -0.72572 | H  | 0.49459  | 1.08866  | 2.71394  |
| C | -2.21425 | -2.87053 | -0.10182 | H  | 5.57443  | -3.84373 | 3.42172  |
| C | -0.94853 | -3.45472 | -0.07401 | H  | 4.27783  | -2.73719 | 5.20073  |
| C | 0.20226  | -2.66399 | -0.03283 | H  | 3.77808  | -1.76648 | -1.83047 |
| N | 0.16742  | -1.32897 | -0.02654 | H  | 5.54539  | -3.47357 | -1.41215 |
| H | 0.49783  | -1.08963 | -2.71473 | H  | 6.06977  | -4.13857 | 0.94206  |
| H | 5.57029  | 3.85075  | -3.41962 | H  | 2.48313  | 1.06629  | -5.87457 |
| H | 4.27647  | 2.74215  | -5.19937 | H  | 0.78756  | -0.62322 | -5.14746 |
| H | 3.77424  | 1.77061  | 1.83154  | H  | -4.44384 | -1.21501 | -0.04748 |
| H | 5.53909  | 3.48051  | 1.41424  | H  | 1.18004  | 3.12233  | 0.02916  |
| H | 6.06375  | 4.14636  | -0.93967 | H  | -0.85188 | 4.53082  | 0.1063   |
| H | -0.84481 | -4.534   | -0.10734 | H  | -6.36683 | -3.45104 | 0.31777  |
| H | 1.18503  | -3.12217 | -0.02966 | H  | -8.16683 | -2.81033 | -1.2656  |
| H | -4.44587 | 1.20594  | 0.04569  | H  | -7.62797 | -2.36403 | -3.65062 |
| H | -8.18113 | 2.85639  | 1.28048  | H  | -5.2901  | -2.597   | -4.45861 |
| H | -7.63139 | 2.36595  | 3.65429  | H  | -3.49573 | -3.295   | -2.89628 |
| H | -5.28426 | 2.55079  | 4.44774  | H  | -6.38318 | 3.4933   | -0.30692 |
